# Supplementary material
Source: PubMed Central journal article supplement (PMC5813732)
Supplement: Supp_Fig1.pdf [file Supp_Fig1.pdf]

## Supplementary Data

| Layout       | 01           | 02           | 03           | 04          | 05           | 06            | 07            | 08           | 09           | 10           | 11           | 12          |
|--------------|--------------|--------------|--------------|-------------|--------------|---------------|---------------|--------------|--------------|--------------|--------------|-------------|
| <b>A</b>     | ACSL3        | ACSL4        | ACSL5        | ADM         | ARNT         | ATF4          | AXIN2         | BAX          | BBC3         | BCL2         | BCL2A1       | BCL2L1      |
| <b>Sal-B</b> | <b>-1.36</b> | <b>-1.16</b> | <b>-1.33</b> | <b>1.69</b> | <b>1.05</b>  | <b>1.34</b>   | <b>1.33</b>   | <b>1.42</b>  | <b>2.03</b>  | <b>1.45</b>  | <b>1.67</b>  | <b>1.43</b> |
| <b>B</b>     | BIRC3        | BMP2         | BMP4         | BTG2        | CA9          | CCL5          | CCND1         | CCND2        | CDKN1A       | CDKN1B       | CEBPD        | CPT2        |
| <b>Sal-B</b> | <b>1.35</b>  | <b>1.57</b>  | <b>1.18</b>  | <b>1.52</b> | <b>2.75</b>  | <b>-10.38</b> | <b>1.60</b>   | <b>1.45</b>  | <b>-1.02</b> | <b>1.25</b>  | <b>1.56</b>  | <b>1.09</b> |
| <b>C</b>     | CSF1         | DAB2         | EGFR         | EMP1        | EPO          | FABP1         | FAS           | FCER2        | FOSL1        | FTH1         | GADD45A      | GADD45B     |
| <b>Sal-B</b> | <b>1.54</b>  | <b>1.38</b>  | <b>1.19</b>  | <b>2.28</b> | <b>1.41</b>  | <b>-1.12</b>  | <b>1.46</b>   | <b>-3.07</b> | <b>1.24</b>  | <b>-1.06</b> | <b>-1.06</b> | <b>1.79</b> |
| <b>D</b>     | GATA3        | GCLC         | GCLM         | GSR         | HERPUD1      | HES1          | HES5          | HEY1         | HEY2         | HEYL         | HMOX1        | ICAM1       |
| <b>Sal-B</b> | <b>2.16</b>  | <b>1.69</b>  | <b>1.29</b>  | <b>1.61</b> | <b>-1.10</b> | <b>1.23</b>   | <b>-31.04</b> | <b>1.19</b>  | <b>1.92</b>  | <b>1.17</b>  | <b>1.59</b>  | <b>2.52</b> |
| <b>E</b>     | ID1          | IFNG         | IFRD1        | IRF1        | JAG1         | LDHA          | LFNG          | LRG1         | MCL1         | MMP7         | MYC          | NOTCH1      |
| <b>Sal-B</b> | <b>1.41</b>  | <b>2.74</b>  | <b>1.43</b>  | <b>1.61</b> | <b>1.52</b>  | <b>-1.16</b>  | <b>1.83</b>   | <b>1.15</b>  | <b>1.26</b>  | <b>7.14</b>  | <b>1.24</b>  | <b>1.50</b> |
| <b>F</b>     | NQO1         | OLR1         | PCNA         | PPARD       | PTCH1        | RB1           | SERPINE1      | SLC27A4      | SLC2A1       | SOCS3        | SORBS1       | SQSTM1      |
| <b>Sal-B</b> | <b>1.20</b>  | <b>1.53</b>  | <b>1.46</b>  | <b>1.15</b> | <b>1.25</b>  | <b>-1.06</b>  | <b>2.10</b>   | <b>1.28</b>  | <b>1.31</b>  | <b>1.35</b>  | <b>-1.04</b> | <b>1.47</b> |
| <b>G</b>     | STAT1        | TNF          | TNFSF10      | TXN         | TXNRD1       | VEGFA         | WISP1         | WNT1         | WNT2B        | WNT3A        | WNT5A        | WNT6        |
| <b>Sal-B</b> | <b>1.45</b>  | <b>1.79</b>  | <b>1.75</b>  | <b>1.07</b> | <b>1.56</b>  | <b>1.00</b>   | <b>2.05</b>   | <b>-1.22</b> | <b>-1.05</b> | <b>1.94</b>  | <b>1.16</b>  | <b>4.30</b> |

**SUPPLEMENTARY FIG. S1.** PCR array analysis of signaling pathways. The expression changes of 84 genes representing 10 signaling pathways determined by Signal Transduction PathwayFinder PCR Array (PAHS-014Z; SABiosciences) analysis at day 14 of differentiation of human embryonic stem cells treated with or without Sal B at the concentration of 1  $\mu$ M. The name of each gene and its expression fold change compared to those without Sal B is shown in the same grid. The genes and their representative pathways can be found at SABiosciences website ([www.sabiosciences.com/rt\\_pcr\\_product/HTML/PAHS-014Z.html](http://www.sabiosciences.com/rt_pcr_product/HTML/PAHS-014Z.html)). PCR, polymerase chain reaction; Sal B, salvianolic acid B.
