# Supplementary material
Source: PubMed Central journal article supplement (PMC5813732)
Supplement: Supp_Table1.pdf [file Supp_Table1.pdf]

SUPPLEMENTARY TABLE S1. COMPOUNDS  
IDENTIFIED IN FUZHENG HUAYU

---

*Compounds identified in Fuzheng Huayu*

---

|    |                         |
|----|-------------------------|
| 1  | Danshensu               |
| 2  | Protocatechuic aldehyde |
| 3  | Rosmarinic acid         |
| 4  | Salvianolic acid B      |
| 5  | Schizandrol A           |
| 6  | Schizandrol B           |
| 7  | Schizandrin A           |
| 8  | Uridine                 |
| 9  | Guanosine               |
| 10 | Adenosine               |

---
