# Supplementary material
Source: PubMed Central journal article supplement (PMC5813732)
Supplement: Supp_Table2.pdf [file Supp_Table2.pdf]

SUPPLEMENTARY TABLE S2. INFORMATION OF PRIMERS AND PROBES USED

| <i>Genes</i> | <i>Information or sequences of primers</i>                             | <i>Application</i> |
|--------------|------------------------------------------------------------------------|--------------------|
| Albumin      | Hs00609411_m1 (Applied Biosystems)                                     | TaqMan             |
| CK7          | Hs00559840_m1 (Applied Biosystems)                                     | TaqMan             |
| ASGPR        | Hs00155881_m1 (Applied Biosystems)                                     | TaqMan             |
| CYP3A4       | Hs00430021_m1 (Applied Biosystems)                                     | TaqMan             |
| CYP2C9       | Hs00426397_m1 (Applied Biosystems)                                     | TaqMan             |
| CYP2C19      | Hs00426380_m1 (Applied Biosystems)                                     | TaqMan             |
| UTG1A1       | Hs02511055_s1 (Applied Biosystems)                                     | TaqMan             |
| UTG1A3       | Hs04194492_g1 (Applied Biosystems)                                     | TaqMan             |
| UTG1A6       | Hs01592477_m1 (Applied Biosystems)                                     | TaqMan             |
| UTG1A8       | Hs01592482_m1 (Applied Biosystems)                                     | TaqMan             |
| UTG2B7       | Hs00426592_m1 (Applied Biosystems)                                     | TaqMan             |
| Glut2        | Hs01096908_m1 (Applied Biosystems)                                     | TaqMan             |
| TAT          | Hs00356930_m1 (Applied Biosystems)                                     | TaqMan             |
| GAPDH        | Hs99999905_m1 (Applied Biosystems)                                     | TaqMan             |
| Wnt1         | F: 5'-CTGCAGCGACAACATTGACTT-3'<br>R: 5'-GTTGTTGTGAAGGTTTCATGAGG-3'     | SYBR               |
| cyclin D1    | F: 5'-GGTCTGCGAGGAACAGAAGTG-3'<br>R: 5'-TGCAGGCGGCTCTTTTTC-3'          | SYBR               |
| c-Myc        | F: 5'-AGCTCATTCTGAAGAGGACTTGT-3'<br>R: 5'-CCCTACTTTTTATCCCTTGTCTCC-3'  | SYBR               |
| LEF1         | F: 5'-CTGAGGTGTTACAATAGCTGGATG-3'<br>R: 5'-CTGAGGTGTTACAATAGCTGGATG-3' | SYBR               |
| TCF3         | F: 5'-TTACTTCTCGTCCAGCCCTTCTAC-3'<br>R: 5'-GGTCTTCTATCTTACTCTGCAGGC-3' | SYBR               |
| GAPDH        | F: 5'-GAAGATGGTGATGGGATTTTC-3'<br>R: 5'-GAAGGTGAAGGTCGGAGTC-3'         | SYBR               |
| Notch1       | F: GGCCAGAAGTGTGAGGAAAATATC<br>R: ACAGTACTGACCTGTCCACTCTGG             | SYBR               |
| Wnt3         | F: 5'-GAGATGGTAGTAGAGAAGCACCGT-3'<br>R: 5'-AAGTTGGGGGAGTTCTCGTAGTAG-3' | SYBR               |
| β-catenin    | F: 5'-TGGACTCTGGAATCCATTCTG-3'<br>R: 5'-AAAATCCCTGTTCCCACTCA-3'        | SYBR               |
| Jagged 2     | F: ACGAGAAGTACTACAGCGCCACTT<br>R: TACACACAGCTTCCTTGCACTC               | SYBR               |
| Hes1         | F: CTGAGCACAGAAAGTCATCAAAGC<br>R: GAGCTATCTTTCTTCAGAGCATCC             | SYBR               |
| Hes5         | F: TCAGTACCTGAAGCACAGCAAAG<br>R: TGGAAAGTGGTACAGCAGCTTCATC             | SYBR               |
| Wnt2         | F: ATCTCTGGAGGAAGTACAATGGGG<br>R: TCTCGGTCCCTGATACAGTAGTCT             | SYBR               |
| Wnt3a        | F: GACTTCCTCAAGGACAAGTACGAC<br>R: TGGGCACCTTGAAGTAGGTGTA               | SYBR               |
| Wnt7a        | F: AGATCCTGGAGGAGAACATGAAGC<br>R: CGTTGTACTTGTCTTGAGCACGT              | SYBR               |
| Wnt7b        | F: CACCTGCTGAAGGAGAAGTACAAC<br>R: CTCAATGTACACCAGGTCTGTCTC             | SYBR               |
| Wnt10b       | F: GGGCCATCTTCATTGATACCCACA<br>R: GGAGACTTCTCAAAGTAGACCAGC             | SYBR               |

ASGPR, asialoglycoprotein receptor; CYP, cytochrome P450; GAPDH, glyceraldehyde-3-phosphate dehydrogenase; Glut2, glucose transporter protein 2; Hes1, hairy and enhancer of split-1; Hes5, hairy and enhancer of split 5; LEF1, lymphoid enhancer-binding factor 1; TAT, tyrosine aminotransferase; TCF3, T cell factor 3; UGT, UDP-glucuronosyl-S-transferase.
