# Supplementary material
Source: PubMed Central journal article supplement (PMC5813732)
Supplement: Supp_Table3.pdf [file Supp_Table3.pdf]

SUPPLEMENTARY TABLE S3. LIST OF ANTIBODIES USED

| <i>Antigen</i>                  | <i>Type</i>                                             | <i>Provider</i>                     | <i>Application</i> |
|---------------------------------|---------------------------------------------------------|-------------------------------------|--------------------|
| Albumin                         | Goat polyclonal                                         | Bethyl                              | IHC                |
| Cyclin D1                       | Mouse monoclonal                                        | Cell Signaling Technology           | WB                 |
| Wnt1                            | Rabbit polyclonal                                       | GeneTex                             | WB                 |
| Histone H3K27<br>trimethylation | Rabbit polyclonal                                       | EpiGentek                           | WB                 |
| $\beta$ -catenin                | Rabbit monoclonal                                       | Cell Signaling Technology           | WB                 |
| Numb                            | Rabbit monoclonal                                       | Cell Signaling Technology           | WB                 |
| Hes1                            | Rabbit monoclonal                                       | GeneTex                             | WB                 |
| Jagged2                         | Rabbit monoclonal                                       | Cell Signaling Technology           | WB                 |
| c-Myc                           | Rabbit monoclonal                                       | Cell Signaling Technology           | WB                 |
| GAPDH                           | Mouse monoclonal                                        | Abcam                               | WB                 |
| Ki67                            | Rabbit polyclonal                                       | Abcam                               | IHC                |
| Mouse IgG                       | Alexa Fluor <sup>®</sup> 488-conjugated goat polyclonal | Jackson ImmunoResearch Laboratories | IHC                |
| Goat IgG                        | Cy3-conjugated donkey polyclonal                        | Jackson ImmunoResearch Laboratories | IHC                |

IHC, immunohistochemistry; WB, western blot.
